# Supplementary material for: Structurally Tunable Reduced Graphene Oxide Substrate Maintains Mouse Embryonic Stem Cell Pluripotency
Source: PubMed Central journal article supplement (PMC6662269; doi:10.1002/advs.201802136), 2019-04-17
Supplement: ADVS-6-1802136-s001.pdf [file ADVS-6-1802136-s001.pdf]

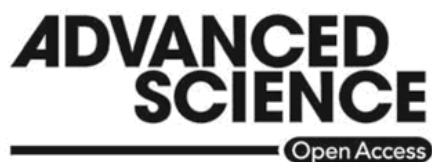

## Supporting Information

for *Adv. Sci.*, DOI: 10.1002/advs.201802136

**Structurally Tunable Reduced Graphene Oxide Substrate  
Maintains Mouse Embryonic Stem Cell Pluripotency**

*Jinping Zhao, Mingliang Tang, Jing Cao, Dan Ye, Xudong Guo, Jiajie Xi, Yi Zhou, Yuchen Xia, Jing Qiao, Renjie Chai,\* Xiaowei Yang,\* and Jiuhong Kang\**

## Supporting Information

**Structurally Tunable Reduced Graphene Oxide Substrate Maintains Mouse Embryonic Stem Cell Pluripotency**

*Jinping Zhao, Mingliang Tang, Jing Cao, Dan Ye, Xudong Guo, Jiajie Xi, Yi Zhou, Yuchen Xia, Jing Qiao, Renjie Chai\*, Xiaowei Yang\* and Jiuhong Kang\**

J. Zhao, Dr. D. Ye, Dr. X. Guo, Dr. J. Xi, Y. Xia, J. Qiao, Prof. J. Kang

Clinical and Translational Research Center of Shanghai First Maternity and Infant Health Hospital, School of Life Science and Technology, Tongji University, Shanghai 200092, China

E-mail: jhkang@tongji.edu.cn

J. Zhao, J. Cao, Y. Zhou, Prof. X. Yang

Institute for Regenerative Medicine, Shanghai East Hospital, School of Materials Science and Engineering, Tongji University, Shanghai 200092, China

E-mail: yangxw@tongji.edu.cn

Prof. M. Tang, Prof. R. Chai

Key Laboratory for Developmental Genes and Human Disease, Ministry of Education, Institute of Life Sciences, Jiangsu Province High-Tech Key Laboratory for Bio-Medical Research, Southeast University, Nanjing 210096, China.

Co-Innovation Center of Neuroregeneration, Nantong University, Nantong 226001, China.

Institute for Stem Cell and Regeneration, Chinese Academy of Science, Beijing, China.

Email: renjie@seu.edu.cn

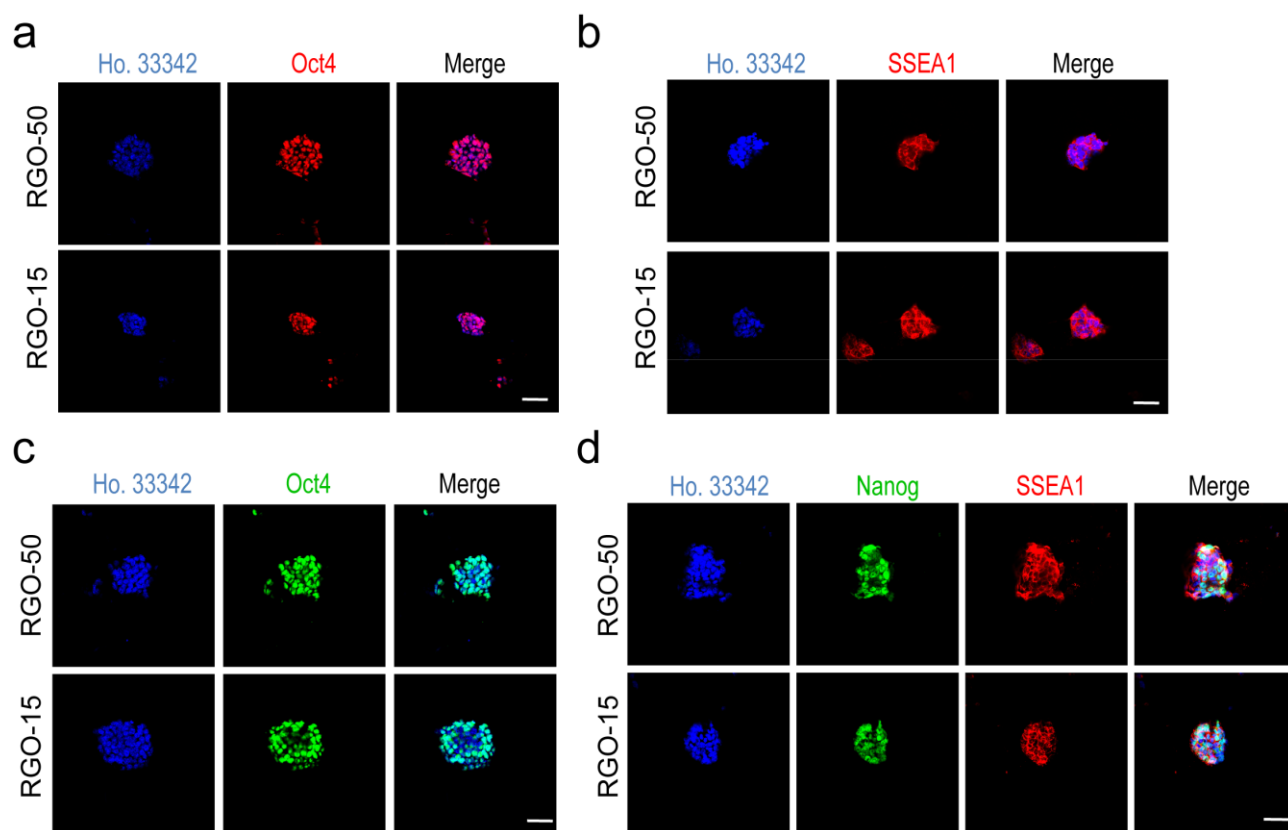

**Figure S1.** The protein levels of Oct4 (a) and SSEA1 (b) in NR3 cultured on RGO-50 and RGO-15 substrates. Scale bar: 50  $\mu\text{m}$  in (a, b). The immunofluorescent staining of Oct4 (c), Nanog (d) and SSEA1 (d) in 46C cultured on RGO-50 and RGO-15 substrates. Scale bar: 50  $\mu\text{m}$  in (c, d).

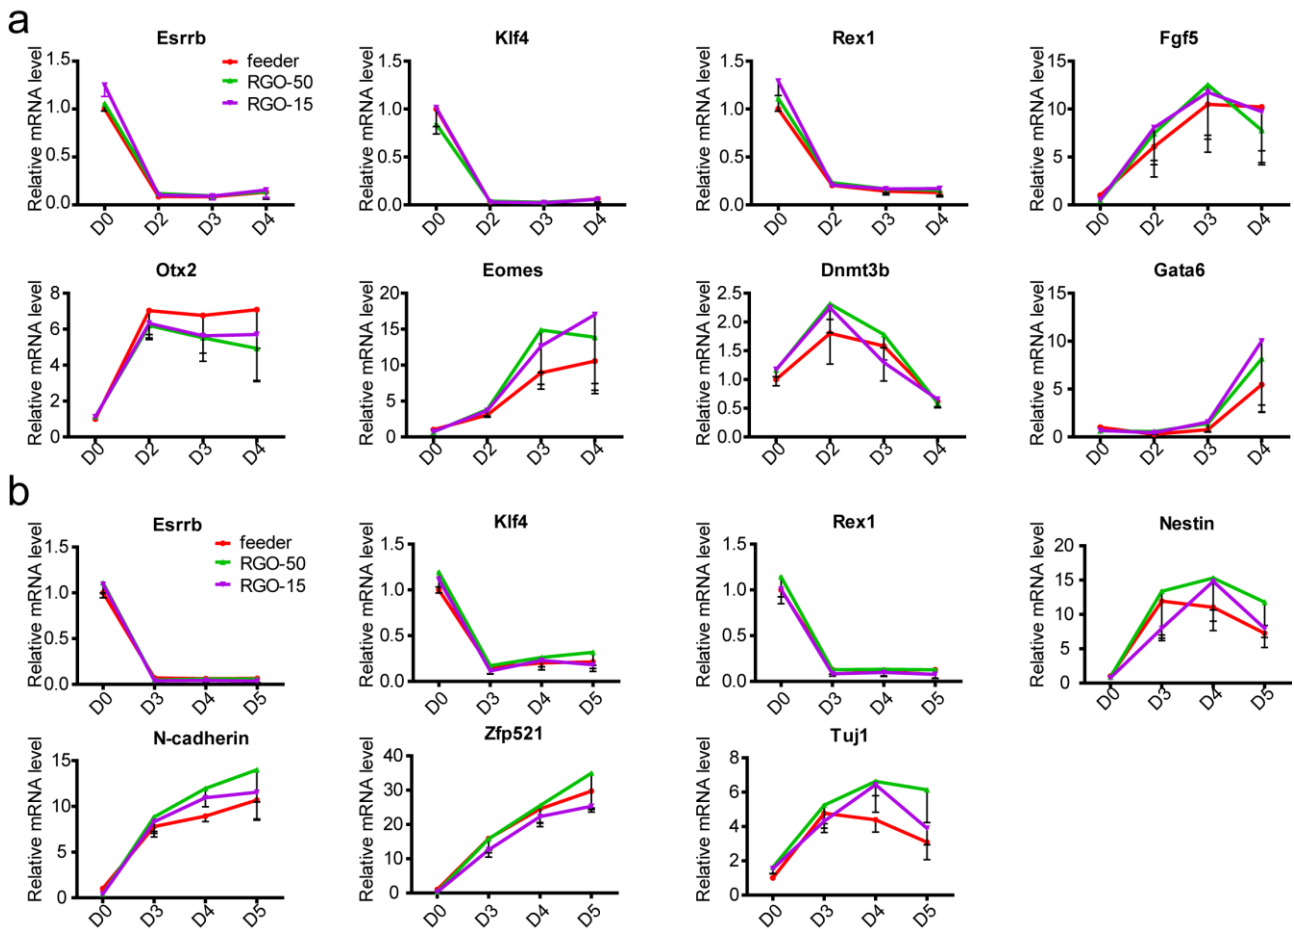

**Figure S2.** a) qRT-PCR was performed to analyse the relative levels of pluripotency gene and mesendoderm gene during early differentiation in 46C on RGO-50 and RGO-15 substrates. b) The relative expression levels of Esrrb, Klf4, Rex1, Nestin, N-cad, Zfp521 and Tuj1 in 46C cultured on RGO-50 and RGO-15 substrates.

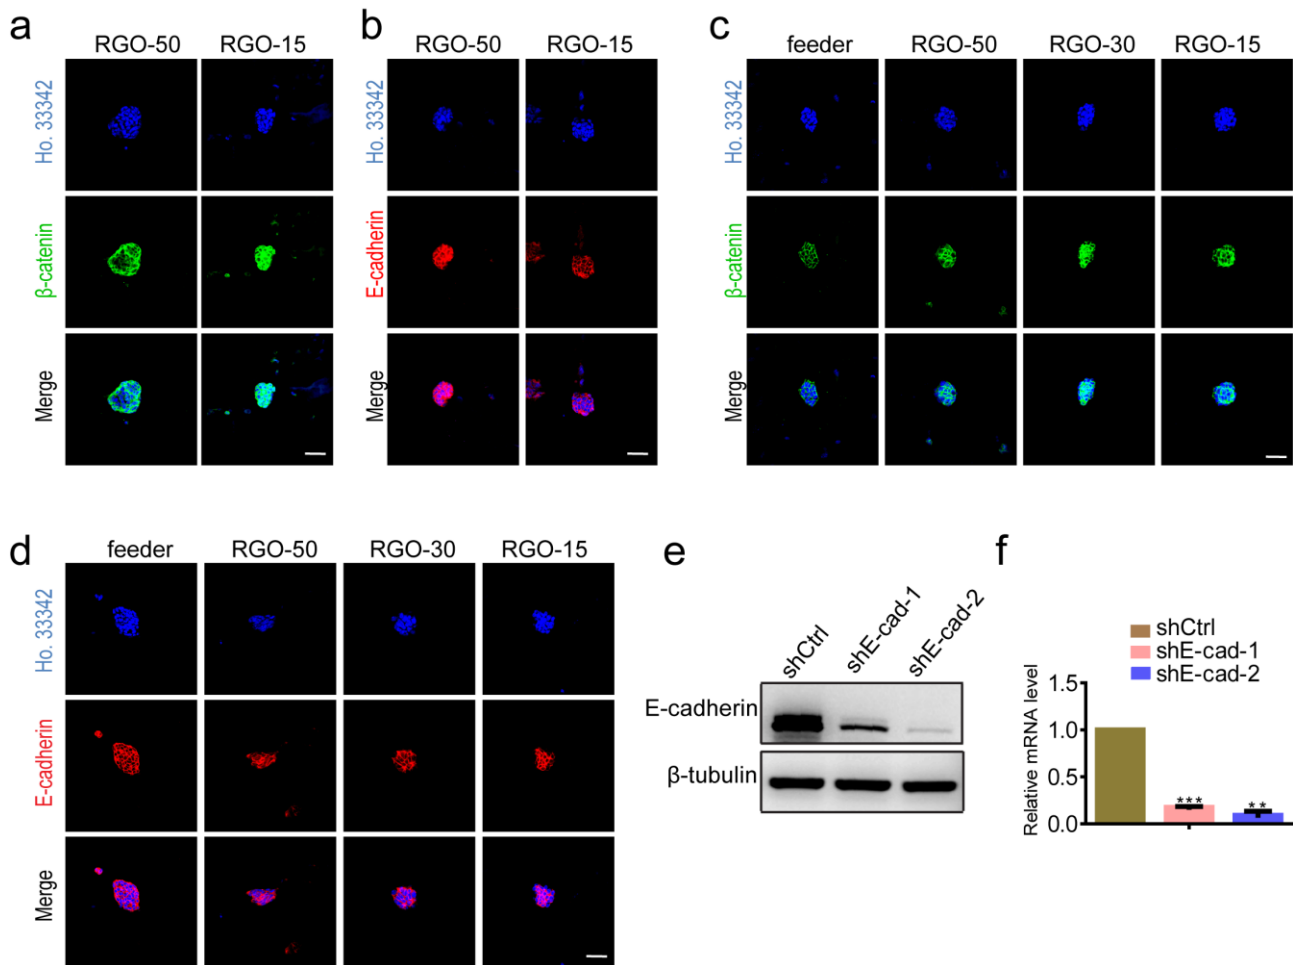

**Figure S3.** The fluorescence microscope images of  $\beta$ -catenin (a) and E-cadherin (b) in 46C on RGO-50 and RGO-15 substrates. Scale bar: 50  $\mu$ m. The protein expression levels of  $\beta$ -catenin (c) and E-cadherin (d) of NR3 cultured on feeder, RGO-50, RGO-30 and RGO-15 substrates. Scale bar: 50  $\mu$ m in (c, d). e) The western blotting of E-cadherin in shCtrl, shE-cad-1 and shE-cad-2 cultured on RGO-30 substrate. f) The expression level of E-cadherin in shE-cad-1 and shE-cad-2 cultured on RGO-30 substrate was confirmed by qRT-PCR. \*\* p < 0.01, \*\*\* p < 0.001 versus shCtrl group.

**Table S1. The list of primer sequences**

| Application | Gene       | Forward primer                                                | Reverse primer                                                 |
|-------------|------------|---------------------------------------------------------------|----------------------------------------------------------------|
| shRNA       | shE-cad-1  | CCGGGCTGGAATCTTTGTCCATGTACTC<br>GAGTACATGGACAAAGATTCCAGCTTTTT | AATTCAAAAAGCTGGAATCTTTGTCCATGTACTC<br>GAGTACATGGACAAAGATTCCAGC |
|             |            | G                                                             |                                                                |
| shRNA       | shE-cad-2  | CCGGCCGAGAGAGTTACCCTACATACTC<br>GAGTATGTAGGGTAACTCTCTCGGTTTTT | AATTCAAAAACCGAGAGAGTTACCCTACATACTC<br>GAGTATGTAGGGTAACTCTCTCGG |
|             |            | G                                                             |                                                                |
| qRT-PCR     | Nanog      | CAGGTGTTTGAGGGTAGCTC                                          | CGGTCATCATGGTACAGTC                                            |
| qRT-PCR     | Oct4       | TCTTTCCACCAGGCCCGGCTC                                         | TGCGGGCGGACATGGGGAGATCC                                        |
| qRT-PCR     | Sox2       | GATCAGCATGTACTCCCC                                            | CCCTCCCAATTCCTTGTATC                                           |
| qRT-PCR     | Klf4       | GTGCAGCTTGAGCAGTAAC                                           | AGCGAGTTGAAAGGATAAAGTC                                         |
| qRT-PCR     | Esrrb      | TGGCAGGCAAGGATGACAGA                                          | TTTACATGAGGGCCGTGGGA                                           |
| qRT-PCR     | Rex1       | GGAAGAAATGCTGAAGGTGGAGAC                                      | AGTCCCATCCCCTTCAATAGC                                          |
| qRT-PCR     | Fgf5       | AAAGTCAATGGCTCCCACGAA                                         | GGCACTTGCATGGAGTTTTCC                                          |
| qRT-PCR     | Otx2       | CCATGACCTATACTCAGGCTTCAGG                                     | GAAGCTCCATATCCCTGGGTGGAAAG                                     |
| qRT-PCR     | Eomes      | CCTGGTGGTGTTTTGTTGTG                                          | TTTAATAGCACCGGGCACTC                                           |
| qRT-PCR     | Dnmt3b     | AGCGGGTATGAGGAGTGCAT                                          | GGGAGCATCCTTCGTGTCTG                                           |
| qRT-PCR     | Gata6      | GACGGCACCGGTCATTACC                                           | ACAGTTGGCACAGGACAGTCC                                          |
| qRT-PCR     | Nestin     | CTGCAGGCCACTGAAAAGTT                                          | GACCCTGCTTCTCCTGCTC                                            |
| qRT-PCR     | Zfp521     | GAGCGAAGAGGAGTTTTTGG                                          | AGTTCCAAGGTGGAGGTCAC                                           |
| qRT-PCR     | N-cadherin | TCCTGATATATGCCCAAGACAA                                        | TGACCCAGTCTCTCTTCTG                                            |
| qRT-PCR     | Tuj1       | TAGACCCCAGCGGCAACTAT                                          | GTTCCAGGTTCCAAGTCCACC                                          |
| qRT-PCR     | E-cadherin | CAGCCTTCTTTTCGGAAGACT                                         | GGTAGACAGCTCCCTATGACTG                                         |
| qRT-PCR     | GAPDH      | GTGTTCTACCCCAATGTGT                                           | ATTGTCATACCAGGAAATGAGCTT                                       |
